# Supplementary material for: A Multicenter, Observational, Prospective Study of the Effectiveness of Switching from Budesonide/Formoterol Turbuhaler® to Budesonide/Formoterol Easyhaler®
Source: Springer Nature journal article supplement (doi:10.1007/s12325-019-00940-7), 2019-04-02
Supplement: MOESM1 [file 16591218]

**Supplementary Table 1.** Patient assessment of inhaler and the complexity of the instructions for use

| Question | Please select most appropriate response |
| --- | --- |
| Patient perspective on inhaler use | |
| How easy was it to learn how to use the inhaler? | 1 (very easy) – 6 (unsatisfactory) |
| How easy was it to prepare the inhaler for use? | 1 (very easy) – 6 (unsatisfactory) |
| How easy is it to handle/operate the inhaler in everyday situations? | 1 (very easy) – 6 (unsatisfactory) |
| How easy is it to make a successful inhalation in everyday situations? | 1 (very easy) – 6 (unsatisfactory) |
| How easy is it to keep the inhaler clean and ready to use? | 1 (very easy) – 6 (unsatisfactory) |
| How easy is it to perform daily activities with the inhaler? | 1 (very easy) – 6 (unsatisfactory) |
| Given its size and weight, how easy is it to carry the inhaler? | 1 (very easy) – 6 (unsatisfactory) |
| Did you experience any discomfort during use of the inhaler? | Smell  Taste  Cough  Hoarseness  No, nothing  Other (specified by patient) |
| How would you assess your inhaler in general? | 1 (very good) – 6 (insufficient) |
